# Supplementary material for: Evaluation of serum nucleoside diphosphate kinase A for the detection of colorectal cancer
Source: PubMed Central journal article supplement (PMC4879623; doi:10.1038/srep26703), 2016-05-25
Supplement: srep26703-s1.pdf [file srep26703-s1.pdf]

## **Supplementary information**

**Title:** Evaluation of serum nucleoside diphosphate kinase A for the early detection of colorectal cancer.

**Authors:** Olalla Otero-Estévez<sup>†</sup>, Loretta De Chiara<sup>†</sup>, Leticia Barcia-Castro, María Páez de la Cadena, Francisco Javier Rodríguez-Berrocal, Joaquín Cubiella, Vicent Hernández, Vicenta Soledad Martínez-Zorzano\*.

**Supplementary Table S1.** Serum NDKA levels of CRC patients from the case-control cohort according to the characteristics of the tumour.

| <b>Variable</b>              | <b>N</b> | <b>Median<br/>(pg/mL)</b> | <b>IQR<br/>(pg/mL)</b> | <b>P</b>           |
|------------------------------|----------|---------------------------|------------------------|--------------------|
| <b>Stage</b>                 |          |                           |                        |                    |
| I                            | 2        | 62.06                     | 55.66-68.45            | 0.915 <sup>a</sup> |
| II                           | 9        | 53.38                     | 43.17-74.11            |                    |
| III                          | 1        | 59.65                     |                        |                    |
| IV                           | 4        | 63.98                     | 50.00-75.02            |                    |
| <b>pT</b>                    |          |                           |                        |                    |
| T1                           | 2        | 62.06                     | 55.66-68.45            | 0.916 <sup>a</sup> |
| T2                           | 0        |                           |                        |                    |
| T3                           | 8        | 56.52                     | 42.61-72.87            |                    |
| T4                           | 6        | 63.48                     | 47.47-73.07            |                    |
| <b>pN</b>                    |          |                           |                        |                    |
| N0                           | 11       | 55.66                     | 45.74-71.10            | 0.406 <sup>a</sup> |
| N1                           | 2        | 53.85                     | 48.04-59.65            |                    |
| Nx                           | 3        | 72.09                     | 55.86-75.99            |                    |
| <b>pM</b>                    |          |                           |                        |                    |
| M0                           | 12       | 57.66                     | 46.46-70.44            | 0.599 <sup>b</sup> |
| M1                           | 4        | 63.98                     | 50.00-75.02            |                    |
| <b>Differentiation Grade</b> |          |                           |                        |                    |
| Well                         | 1        | 68.45                     |                        | 0.808 <sup>a</sup> |
| Moderate                     | 14       | 55.76                     | 47.47-73.07            |                    |
| Poor                         | 1        | 60.14                     |                        |                    |
| <b>Location</b>              |          |                           |                        |                    |
| Distal                       | 13       | 59.65                     | 47.18-73.55            | 0.900 <sup>b</sup> |
| Proximal                     | 3        | 55.66                     | 48.04-72.09            |                    |

IQR: interquartile range; <sup>a</sup>Kruskal-Wallis test, <sup>b</sup>Mann-Whitney U test.
